**Table S1. Studies used in the meta-analyses, organized first by reptile Order and then by publication date.** “Mean Temp” is the mean temperature (°C) of the constant or fluctuating incubation treatments. “Range” is the daily range of temperatures, where a treatment such as  $\pm 3^{\circ}\text{C}$  would equal a Range of 6°C. Treatments with Range = 0°C are the control group for each paper. Treatments were identified as the control if the study referred to the treatment as “constant” or if the daily range of temperatures was presented as  $\leq 1^{\circ}\text{C}$ . For each response variable, “1” indicates the paper was included in the associated meta-analyses (phenotypic mean and variance), whereas “0” indicates the paper was not included in the associated meta-analyses. Full reference information is found in the References section of the main manuscript.

| Paper                        | Family       | Species                                                        | Mean Temp (°C) | Range (°C) | Incubation Duration | Survival | Sex | Mass | Length | Speed |
|------------------------------|--------------|----------------------------------------------------------------|----------------|------------|---------------------|----------|-----|------|--------|-------|
| <i>Order Testudines</i>      |              |                                                                |                |            |                     |          |     |      |        |       |
| Bull and Vogt 1979           | Emydidae     | <i>Graptemys ouachitensis</i> ,<br><i>G. pseudogeographica</i> | 25.0           | 0.0        | 0                   | 0        | 1   | 0    | 0      | 0     |
|                              |              |                                                                | 25.0           | 5.0        |                     |          |     |      |        |       |
| Georges et al. 1994          | Cheloniidae  | <i>Caretta caretta</i>                                         | 26.0           | 0.0        | 0                   | 0        | 1   | 0    | 0      | 0     |
|                              |              |                                                                | 26.0           | 6.0        |                     |          |     |      |        |       |
|                              |              |                                                                | 26.0           | 8.0        |                     |          |     |      |        |       |
|                              |              |                                                                | 26.0           | 10.0       |                     |          |     |      |        |       |
|                              |              |                                                                | 26.0           | 12.0       |                     |          |     |      |        |       |
|                              |              |                                                                | 26.0           | 14.0       |                     |          |     |      |        |       |
|                              |              |                                                                | 26.0           | 16.0       |                     |          |     |      |        |       |
| Ashmore and Janzen 2003      | Trionychidae | <i>Apalone mutica</i>                                          | 30.5           | 0.0        | 1                   | 1        | 0   | 1    | 1      | 1     |
|                              |              |                                                                | 30.5           | 4.0        |                     |          |     |      |        |       |
|                              |              |                                                                | 30.5           | 8.0        |                     |          |     |      |        |       |
| Mullins and Janzen 2006      | Trionychidae | <i>Apalone mutica</i>                                          | 28.5           | 0.0        | 1                   | 1        | 0   | 1    | 1      | 1     |
|                              |              |                                                                | 28.5           | 4.0        |                     |          |     |      |        |       |
|                              |              |                                                                | 28.5           | 8.0        |                     |          |     |      |        |       |
|                              |              |                                                                | 32.5           | 0.0        |                     |          |     |      |        |       |
|                              |              |                                                                | 32.5           | 4.0        |                     |          |     |      |        |       |
|                              |              |                                                                | 32.5           | 8.0        |                     |          |     |      |        |       |
| Les et al. 2007              | Emydidae     | <i>Chrysemys picta</i> ,<br><i>Trachemys scripta</i>           | 28.5           | 0.0        | 1                   | 1        | 1   | 1    | 1      | 0     |
|                              |              |                                                                | 28.5           | 6.0        |                     |          |     |      |        |       |
| Du et al. 2009               | Geoemydidae  | <i>Chinemys (Mauremys) reevesii</i>                            | 28.0           | 0.0        | 1                   | 1        | 1   | 1    | 1      | 0     |
|                              |              |                                                                | 28.0           | 6.0        |                     |          |     |      |        |       |
|                              |              |                                                                | 28.0           | 12.0       |                     |          |     |      |        |       |
| Les et al. 2009              | Emydidae     | <i>Chrysemys picta</i> ,<br><i>Trachemys scripta</i>           | 23.0           | 0.0        | 1                   | 1        | 0   | 1    | 1      | 0     |
|                              |              |                                                                | 23.0           | 6.0        |                     |          |     |      |        |       |
|                              |              |                                                                | 31.0           | 0.0        |                     |          |     |      |        |       |
|                              |              |                                                                | 31.0           | 6.0        |                     |          |     |      |        |       |
| Paitz et al. 2010            | Emydidae     | <i>Chrysemys picta</i>                                         | 27.0           | 0.0        | 1                   | 1        | 1   | 1    | 1      | 0     |
|                              |              |                                                                | 27.0           | 8.0        |                     |          |     |      |        |       |
|                              |              |                                                                | 27.0           | 16.0       |                     |          |     |      |        |       |
| McGaugh and Janzen 2011      | Emydidae     | <i>Chrysemys picta</i>                                         | 28.0           | 0.0        | 0                   | 0        | 1   | 0    | 0      | 0     |
|                              |              |                                                                | 28.0           | 4.0        |                     |          |     |      |        |       |
| Micheli-Campbell et al. 2012 | Chelidae     | <i>Elusor macrurus</i>                                         | 28.0           | 0.0        | 1                   | 1        | 0   | 1    | 0      | 1     |
|                              |              |                                                                | 28.0           | 6.0        |                     |          |     |      |        |       |
|                              |              |                                                                | 28.0           | 12.0       |                     |          |     |      |        |       |
| Li et al. 2013a              | Trionychidae | <i>Pelodiscus (Mauremys) sinensis</i>                          | 30.0           | 0.0        | 1                   | 1        | 0   | 1    | 1      | 0     |
|                              |              |                                                                | 30.0           | 6.0        |                     |          |     |      |        |       |
|                              |              |                                                                | 30.0           | 10.0       |                     |          |     |      |        |       |
| Carter et al. 2017           | Emydidae     | <i>Chrysemys picta</i>                                         | 29.0           | 0.0        | 0                   | 0        | 1   | 0    | 0      | 0     |
|                              |              |                                                                | 29.0           | 6.0        |                     |          |     |      |        |       |
| <i>Order Squamata</i>        |              |                                                                |                |            |                     |          |     |      |        |       |
| Shine and Harlow 1996        | Scincidae    | <i>Bassiana (Acritoscincus) duperreyi</i>                      | 23.0           | 0.0        | 1                   | 1        | 0   | 1    | 1      | 1     |

|                                  |            |                                        |      |      |   |   |   |   |   |
|----------------------------------|------------|----------------------------------------|------|------|---|---|---|---|---|
|                                  |            |                                        | 23.0 | 7.5  |   |   |   |   |   |
|                                  |            |                                        | 23.0 | 19.5 |   |   |   |   |   |
| Du and Feng 2008                 | Lacertidae | <i>Takydromus septentrionalis</i>      | 24.0 | 0.0  | 1 | 1 | 0 | 1 | 1 |
|                                  |            |                                        | 24.0 | 6.0  |   |   |   |   |   |
|                                  |            |                                        | 24.0 | 12.0 |   |   |   |   |   |
|                                  |            |                                        | 28.0 | 0.0  |   |   |   |   |   |
|                                  |            |                                        | 28.0 | 6.0  |   |   |   |   |   |
|                                  |            |                                        | 28.0 | 12.0 |   |   |   |   |   |
| Patterson and Blouin-Demers 2008 | Colubridae | <i>Elaphe (Pantherophis) obsoletus</i> | 26.0 | 0.0  | 1 | 1 | 0 | 1 | 1 |
|                                  |            |                                        | 29.0 | 0.0  |   |   |   |   |   |
|                                  |            |                                        | 26.0 | 6.0  |   |   |   |   |   |
|                                  |            |                                        | 29.0 | 6.0  |   |   |   |   |   |
| Andrewartha et al. 2010          | Gekkonidae | <i>Heteronotia binoei</i>              | 32.0 | 0.0  | 1 | 1 | 0 | 0 | 0 |
|                                  |            |                                        | 32.0 | 10.0 |   |   |   |   |   |
|                                  |            |                                        | 32.0 | 18.0 |   |   |   |   |   |
| Warner and Shine 2011            | Agamidae   | <i>Amphibolurus muricatus</i>          | 25.0 | 0.0  | 1 | 1 | 1 | 1 | 1 |
|                                  |            |                                        | 25.0 | 4.0  |   |   |   |   |   |
|                                  |            |                                        | 25.0 | 8.0  |   |   |   |   |   |
|                                  |            |                                        | 28.0 | 0.0  |   |   |   |   |   |
|                                  |            |                                        | 28.0 | 4.0  |   |   |   |   |   |
|                                  |            |                                        | 28.0 | 8.0  |   |   |   |   |   |
| Días et al. 2012                 | Lacertidae | <i>Psammodromus algirus</i>            | 28.0 | 0.2  | 1 | 0 | 0 | 1 | 1 |
|                                  |            |                                        | 28.0 | 8.0  |   |   |   |   |   |
| Lowenborg et al. 2012            | Colubridae | <i>Natrix natrix</i>                   | 25.0 | 0.4  | 1 | 1 | 0 | 1 | 1 |
|                                  |            |                                        | 25.0 | 12.0 |   |   |   |   |   |
| Li et al. 2013b                  | Lacertidae | <i>Lacerta agilis</i>                  | 27.0 | 0.0  | 1 | 1 | 0 | 1 | 1 |
|                                  |            |                                        | 27.0 | 4.0  |   |   |   |   |   |
|                                  |            |                                        | 27.0 | 8.0  |   |   |   |   |   |
|                                  |            |                                        | 27.0 | 12.0 |   |   |   |   |   |
| Qu et al. 2014                   | Scincidae  | <i>Plestiodon chinensis</i>            | 27   | 0    | 1 | 0 | 0 | 1 | 1 |
|                                  |            |                                        | 27   | 3    |   |   |   |   |   |
|                                  |            |                                        | 27   | 5    |   |   |   |   |   |
| Ma et al. 2018                   | Scincidae  | <i>Sphenomorphus incognitus</i>        | 25.0 | 0.0  | 1 | 1 | 0 | 1 | 1 |
|                                  |            |                                        | 25.0 | 6.0  |   |   |   |   |   |
|                                  |            |                                        | 25.0 | 10.0 |   |   |   |   |   |
